# Supplementary material for: Ectopic expression of the GRAS-type transcriptional regulator NSP2 in Parasponia triggers contrasting effects on symbioses
Source: PubMed Central journal article supplement (PMC11557437; doi:10.3389/fpls.2024.1468812), 2024-10-30

(A)

|                                                |                        |
|------------------------------------------------|------------------------|
| miR171h binding site                           | GAGUGAUAUUGAUUCGGCUCG  |
| <i>MtNSP2</i> - putative miR171h binding site  | GAGUGAUAUUGAUCCGGCUC A |
| <i>PanNSP2</i> - putative miR171h binding site | GGUGAUAUUGGUUCGGCUC A  |
| <i>mNSP2</i> miR171h (silenced)                | GAGUAAUCUUAGUCCGCCUAA  |

(B)

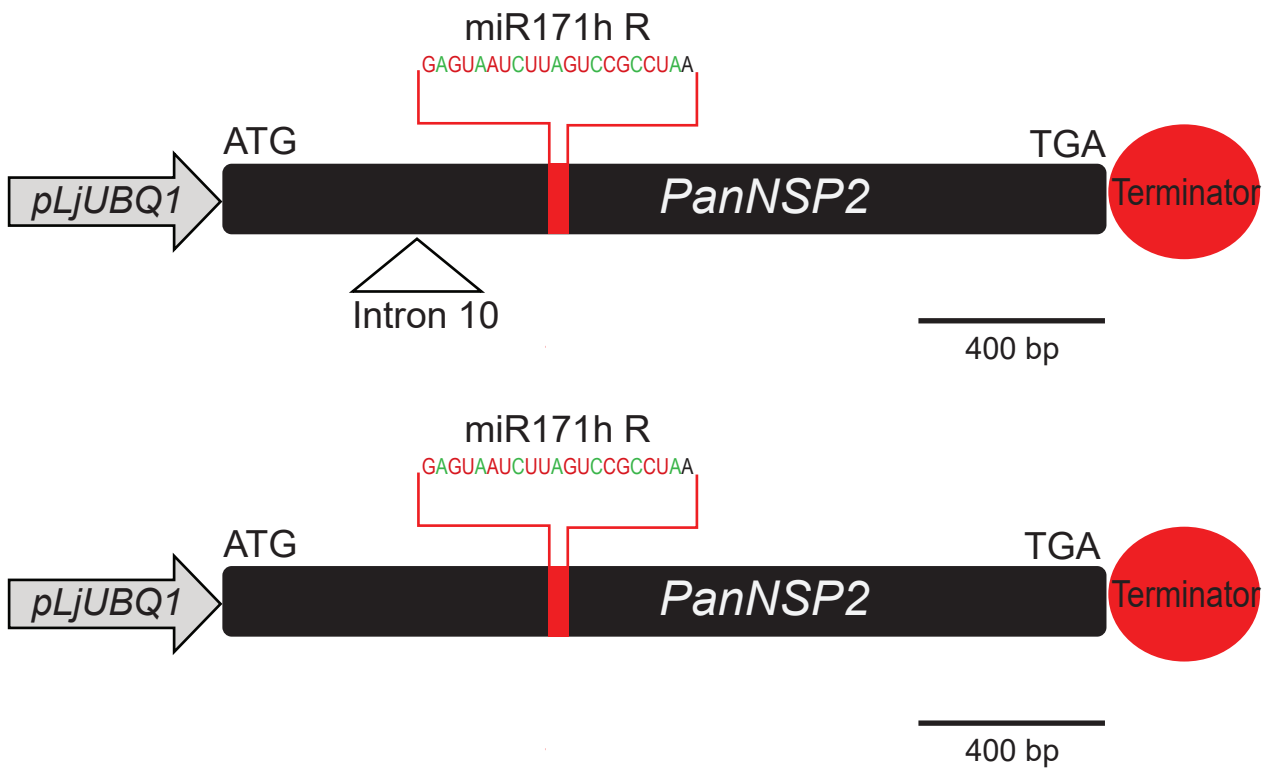

Supplement: DataSheet1.pdf [file DataSheet1.pdf]
