# Supplementary material for: Ectopic expression of the GRAS-type transcriptional regulator NSP2 in Parasponia triggers contrasting effects on symbioses
Source: PubMed Central journal article supplement (PMC11557437; doi:10.3389/fpls.2024.1468812), 2024-10-30

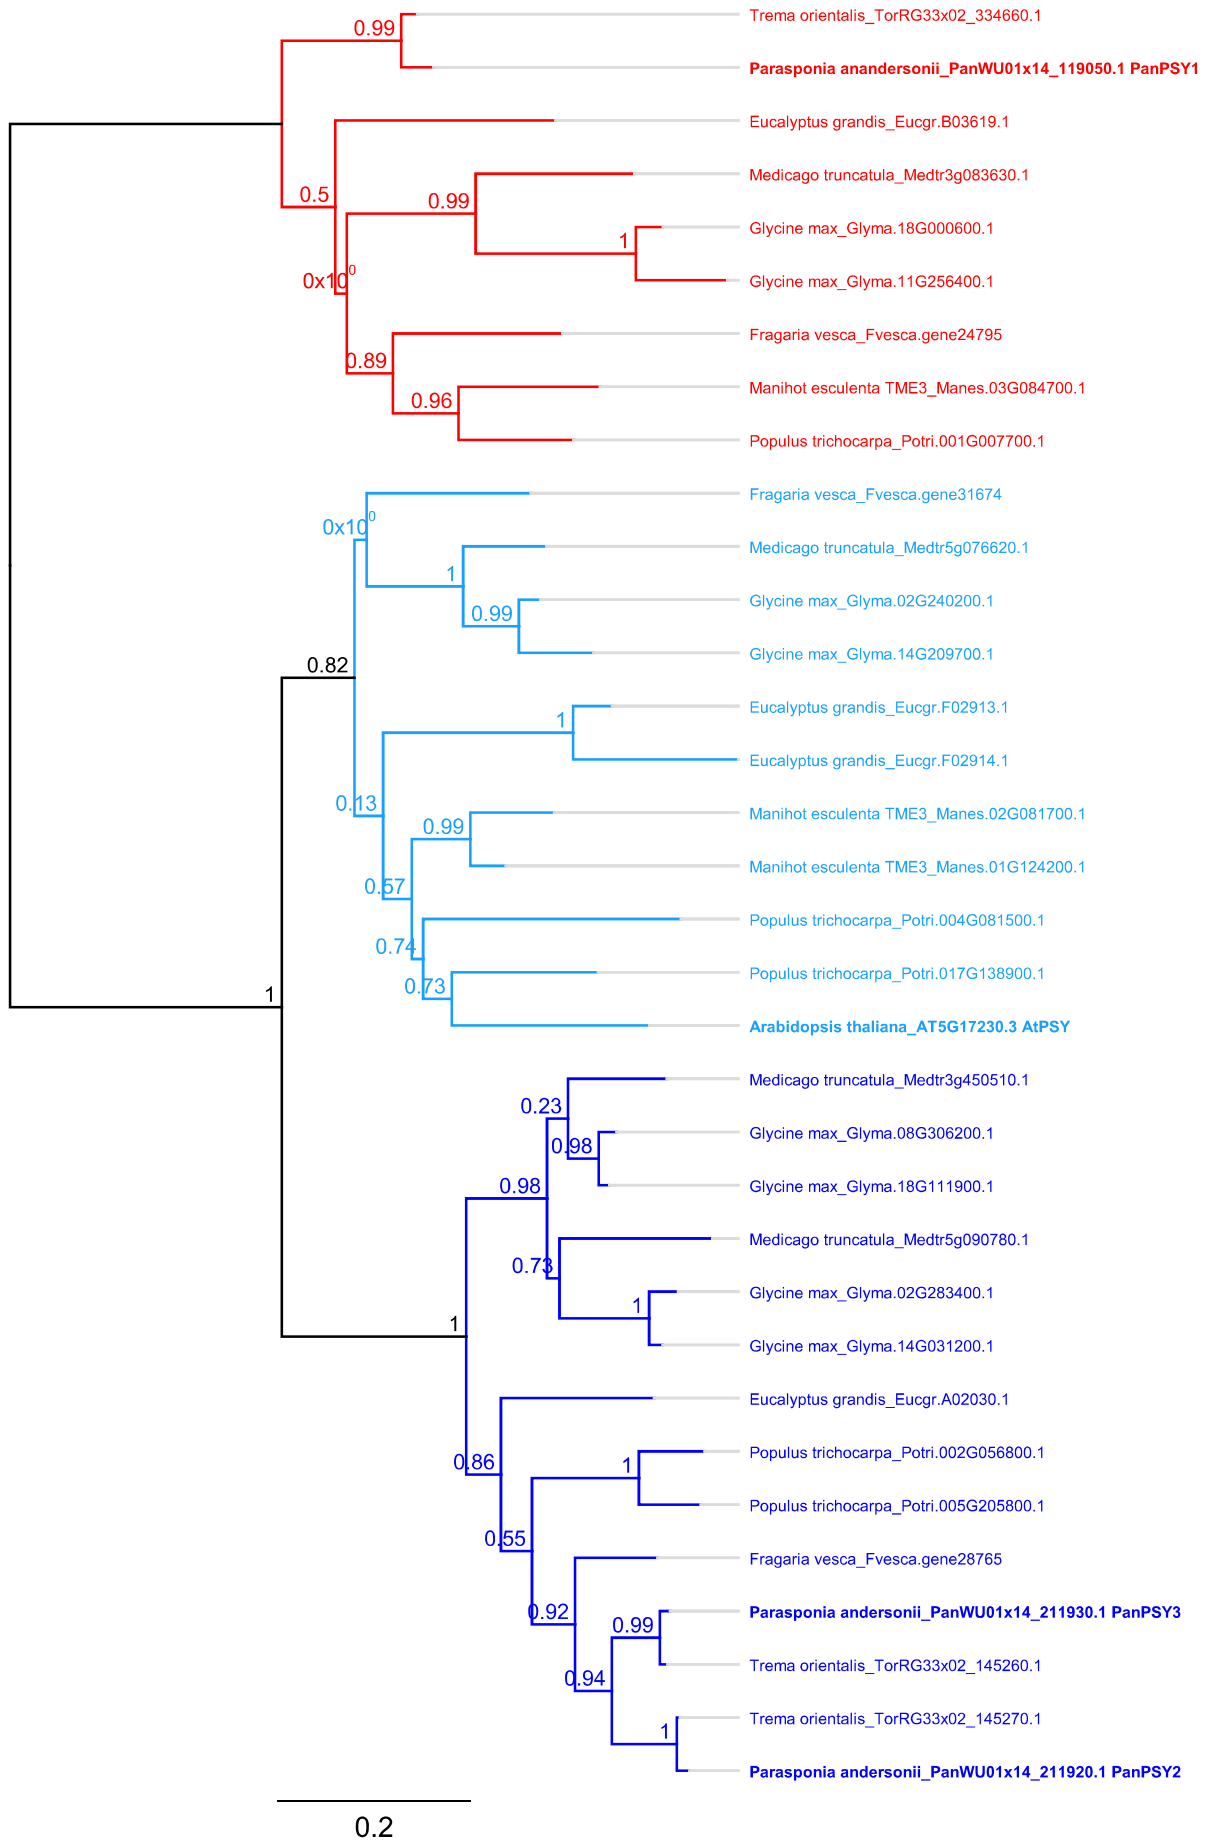

Supplement: DataSheet3.pdf [file DataSheet3.pdf]
