# Supplementary material for: Ectopic expression of the GRAS-type transcriptional regulator NSP2 in Parasponia triggers contrasting effects on symbioses
Source: PubMed Central journal article supplement (PMC11557437; doi:10.3389/fpls.2024.1468812), 2024-10-30
Supplement: DataSheet4.pdf [file DataSheet4.pdf]

| Name                   | Purpose | Sequence              |
|------------------------|---------|-----------------------|
| PanNSP2_For            | qRT-PCR | AGCTGTTGCTGGGATTGTTC  |
| PanNSP2_Rev            | qRT-PCR | GACTTCCAACCCAAAACGAG  |
| Pan Ef-1a_For          | qRT-PCR | AGACAAGGTTAAGCGTGCAG  |
| Pan Ef-1a_Rev          | qRT-PCR | TGCAACTGGGCAACAACTC   |
| PanACT_For             | qRT-PCR | CCTCATTGGAATGGAAGCAC  |
| PanACT_Rev             | qRT-PCR | TTCCAGGAAACATGGTGGAC  |
| PanD27_For             | qRT-PCR | GGATCGCCATTCAACATCTC  |
| PanD27_Rev             | qRT-PCR | GACAAGTTCCCGCTGTTTTG  |
| PanCCD8_For            | qRT-PCR | TGGCAAGATTGTGACGAGTG  |
| PanCCD8_Rev            | qRT-PCR | CCTCCCTTCTTCGTCCTTATC |
| PanCCD7_For            | qRT-PCR | TGAAGAAGACGATGGCTACG  |
| PanCCD7_Rev            | qRT-PCR | AGTTTCGCCACAAGAGCATC  |
| PanNSP2_Genotyping_For | PCR     | ATCCTATCCCAAACACACG   |
| PanNSP2_Genotyping_Rev | PCR     | TTGCTCCAATCCTCCTCTG   |
